# Supplementary material for: Synthesis and Characterization of Silver-Doped Mesoporous Bioactive Glass and Its Applications in Conjunction with Electrospinning
Source: MDPI journal article supplement (doi:10.3390/ma11050692), 2018-04-28
Supplement: s1 [file s1]

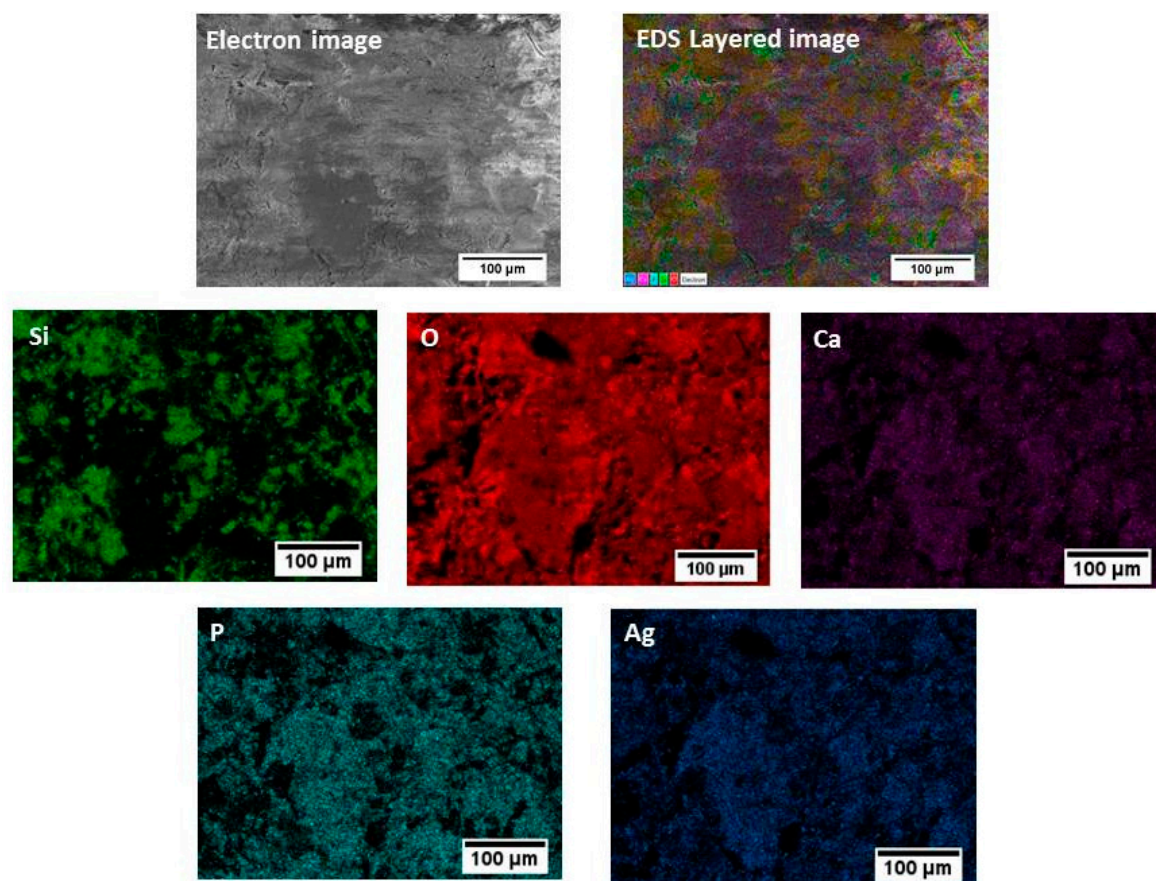

### Supplementary information

Images showing EDX mapping analysis on samples after 3 days of immersion in SBF
